# Supplementary material for: TLR4 Activation Promotes the Progression of Experimental Autoimmune Myocarditis to Dilated Cardiomyopathy by Inducing Mitochondrial Dynamic Imbalance
Source: Hindawi journal article supplement (doi:10.1155/2018/3181278), 2018-01-01

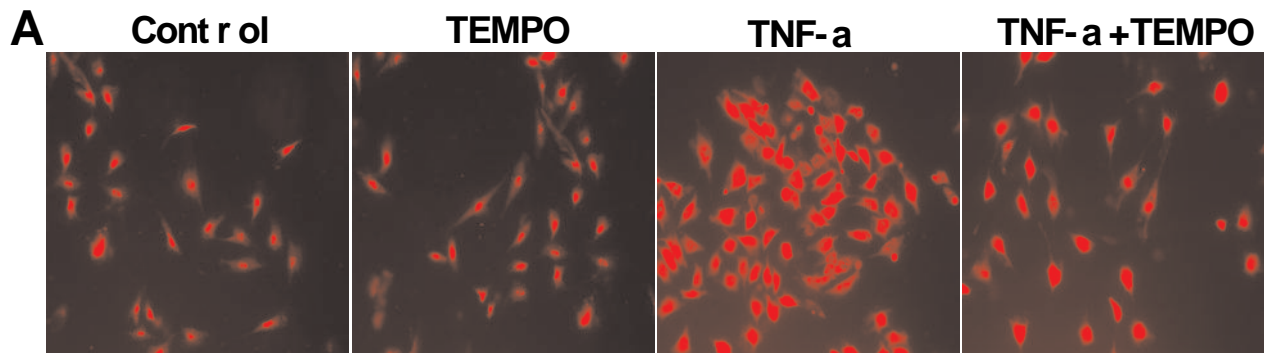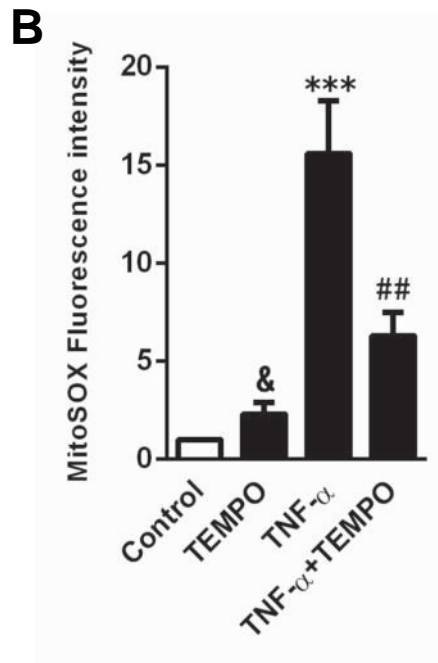

Supplement: f3 [file 3181278.f3.pdf]
